# Supplementary material for: Targeting WEE1 to enhance conventional therapies for acute lymphoblastic leukemia
Source: PubMed Central journal article supplement (PMC6090987; doi:10.1186/s13045-018-0641-1), 2018-08-01
Supplement: 13045_2018_641_MOESM1_ESM.pdf [file 13045_2018_641_MOESM1_ESM.pdf]

**Table S1.** Patient's characteristic of gene expression cohort

| SAMPLE ID | BCR-ABL1 translocation | Stage of the disease | Karyotype                                                                                                | Type of samples | WEE1 relative transcript level | MYT1 relative transcript level |
|-----------|------------------------|----------------------|----------------------------------------------------------------------------------------------------------|-----------------|--------------------------------|--------------------------------|
| ALL_1     | NEGATIVE               | DIAGNOSIS            | NA                                                                                                       | PBL             | 11.40067                       | 5.113971                       |
| ALL_2     | POSITIVE               | RELAPSE              | NA                                                                                                       | PBL             | 9.41669                        | 4.941288                       |
| ALL_3     | NEGATIVE               | DIAGNOSIS            | NA                                                                                                       | BM              | 12.86321                       | 5.010772                       |
| ALL_4     | NEGATIVE               | DIAGNOSIS            | NA                                                                                                       | BM              | 7.901237                       | 5.247456                       |
| ALL_5     | NEGATIVE               | DIAGNOSIS            | NA                                                                                                       | BM              | 10.46552                       | 4.703445                       |
| ALL_6     | POSITIVE               | DIAGNOSIS            | 46,XX [10]                                                                                               | BM              | 9.873922                       | 5.619489                       |
| ALL_7     | POSITIVE               | DIAGNOSIS            | 46XY,t(9;22)(q34;q11)[1]/46XY[2]                                                                         | BM              | 8.034962                       | 4.735756                       |
| ALL_8     | NEGATIVE               | DIAGNOSIS            | 47,XX,+8 [16]/46,XX [4]                                                                                  | BM              | 9.538575                       | 5.238142                       |
| ALL_9     | POSITIVE               | DIAGNOSIS            | 46XX, t(9;22)(q34;q11)[1]. 47XX, +der22 t(9;22)[1].46XX, -7, der12 t(7;12)(q11.2,p13),+der22, t(9;22)[5] | PBL             | 7.667279                       | 4.832946                       |
| ALL_10    | NEGATIVE               | DIAGNOSIS            | NA                                                                                                       | PBL             | 8.896559                       | 4.913634                       |
| ALL_11    | POSITIVE               | DIAGNOSIS            | NA                                                                                                       | PBL             | 8.259012                       | 4.687167                       |
| ALL_12    | POSITIVE               | DIAGNOSIS            | NA                                                                                                       | BM              | 9.566517                       | 5.41777                        |
| ALL_13    | NEGATIVE               | DIAGNOSIS            | 46 XY [20] (t(12;21) neg)                                                                                | PBL             | 10.58061                       | 5.574841                       |
| ALL_14    | POSITIVE               | DIAGNOSIS            | 46,XY [28]                                                                                               | BM              | 8.941937                       | 5.278478                       |
| ALL_15    | NEGATIVE               | DIAGNOSIS            | 46 XX                                                                                                    | BM              | 9.126612                       | 5.552184                       |
| ALL_16    | POSITIVE               | DIAGNOSIS            | 45XX, t(9;22)(q34;q11), der(16)dic(16;20)(q13;11), -20 [20]                                              | BM              | 8.994265                       | 4.775842                       |
| ALL_17    | NEGATIVE               | RELAPSE              | 45XY,-7[9]/45XY,-7,del(9)[3]/46XY [12] /// [DX: 46XY [20]/81chrs [1] nv]                                 | BM              | 9.416733                       | 5.210949                       |
| ALL_18    | NEGATIVE               | DIAGNOSIS            | 46XY [9]                                                                                                 | BM              | 9.894938                       | 4.975881                       |
| ALL_19    | NEGATIVE               | DIAGNOSIS            | 46 XX                                                                                                    | BM              | 10.72273                       | 5.329332                       |
| ALL_20    | NEGATIVE               | DIAGNOSIS            | NA                                                                                                       | PBL             | 9.416162                       | 4.67443                        |
| ALL_21    | POSITIVE               | DIAGNOSIS            | 46,XY, t(9;22)(q34;q11)                                                                                  | BM              | 8.839748                       | 5.196205                       |
| ALL_22    | NEGATIVE               | DIAGNOSIS            | 46XX,der(6)t(1;6)(q11;q11)t(8;14)(q24;q32)del9q21,add(13)(q34)[16/16]                                    | BM              | 11.14958                       | 5.47596                        |
| ALL_23    | NEGATIVE               | DIAGNOSIS            | 46XY [11]/68-71,XXY,-X,-X,-Y,+1,+5,-7,-9,-10,+11,-13,-18,+2 [9]                                          | BM              | 10.722                         | 4.961411                       |
| ALL_24    | POSITIVE               | DIAGNOSIS            | 46XX [13]/45 XX t(9;22)(q34;q11),-13,del(16)(q22) [7/20]                                                 | PBL             | 11.359                         | 4.810295                       |

|        |          |           |                                                                                                                                                                                                                                                                                                       |     |          |          |
|--------|----------|-----------|-------------------------------------------------------------------------------------------------------------------------------------------------------------------------------------------------------------------------------------------------------------------------------------------------------|-----|----------|----------|
| ALL_25 | POSITIVE | RELAPSE   | 45,XX,-<br>7,t(9;22)(q34;q11)[1]/46,XX<br>-,<br>7,t(9;22)(q34;q11),+der(22)t<br>(9;22)(q34;q11)[1]/46,XX,-<br>7,der(9)t(1;9)(q24;q34),t(9;2<br>2)(q34;q11),+der(22)t(9;22)(<br>q34;q11)[10]/46,XX,-<br>7,t(1;13)(p36;q14),der(9)t(1;<br>9)(q24;q34),t(9;22)(q34;q11)<br>-,+der(22)t(9;22)(q34;q11)[2] | BM  | 11.206   | 5.943592 |
| ALL_26 | NEGATIVE | DIAGNOSIS | 46XX, del (9)<br>(13p22p)[12]/46XX[8]                                                                                                                                                                                                                                                                 | BM  | 9.044448 | 5.826427 |
| ALL_27 | NEGATIVE | RELAPSE   | NA                                                                                                                                                                                                                                                                                                    | BM  | 9.867239 | 5.912407 |
| ALL_28 | POSITIVE | RELAPSE   | 47 XX,+5,<br>t(9;22)(q34;q11)[12];47,XX,<br>+5,t(9;22)(q11;q34),<br>DEL(12)(p12)[4].48XX,+5,t<br>(9;22)(q11;q34),+mar [2].                                                                                                                                                                            | BM  | 8.220219 | 4.976336 |
| ALL_29 | NEGATIVE | DIAGNOSIS | 46,XY [17]/<br>46,XY,t(2;16)(q13;q22),<br>t(11;14)(q23;q32) [3]                                                                                                                                                                                                                                       | BM  | 10.92681 | 5.628103 |
| ALL_30 | POSITIVE | RELAPSE   | 45 XY del7,<br>t(9;22)(q34;q11), der12<br>t(7;12)(q11;p11) [16/20], 46<br>XY [4/20]                                                                                                                                                                                                                   | BM  |          |          |
| ALL_31 | POSITIVE | DIAGNOSIS | 46XX,t(9;22) [20/20]                                                                                                                                                                                                                                                                                  | PBL | 9.320931 | 4.92153  |
| ALL_32 | POSITIVE | DIAGNOSIS | 45XY, -<br>3,der(9)t(3;9)(q10;p10),t(9;2<br>2)(q34;q11)[16]/46XY [3]                                                                                                                                                                                                                                  | BM  | 8.193635 | 4.984048 |
| ALL_33 | POSITIVE | RELAPSE   | 46XY<br>[3];45XY,der(14)t(7;14)?,t(9<br>;22)(q34;q11),der(16)t(1;16)<br>?,-17 [2]                                                                                                                                                                                                                     | BM  | 8.371907 | 4.768384 |
| ALL_34 | NEGATIVE | DIAGNOSIS | 46XX[6]/46<br>XX,t(12;17)(p13,q21)[3]                                                                                                                                                                                                                                                                 | PBL | 7.650279 | 4.793464 |
| ALL_35 | NEGATIVE | DIAGNOSIS | 47,XY,del(3)(q13),+6,t(11;1<br>9)(q23;p13) [4]/46,XY [6]                                                                                                                                                                                                                                              | PBL | 11.13743 | 5.28073  |
| ALL_36 | POSITIVE | DIAGNOSIS | NA                                                                                                                                                                                                                                                                                                    | PBL | 7.480791 | 4.621633 |
| ALL_37 | NEGATIVE | RELAPSE   | 46,XY[20]                                                                                                                                                                                                                                                                                             | BM  | 9.457473 | 5.499914 |
| ALL_38 | POSITIVE | DIAGNOSIS | 46XX[12],<br>46XXt(9;22)(q34;q11)<br>[13],46XX del(9)(p13;p22)<br>t(9;22)(q34;q11) [5],46 XX<br>del(9)(p13;p22)<br>t(9;22)(q34;q11)[1]                                                                                                                                                                | BM  | 10.71223 | 5.086938 |
| ALL_39 | POSITIVE | DIAGNOSIS | 46XX, t(9;22) [19/20]                                                                                                                                                                                                                                                                                 | BM  | 9.410629 | 4.68372  |
| ALL_40 | NEGATIVE | DIAGNOSIS | 46 XY [20]                                                                                                                                                                                                                                                                                            | BM  | 9.313448 | 4.959898 |
| ALL_41 | NEGATIVE | RELAPSE   | NA                                                                                                                                                                                                                                                                                                    | BM  | 9.362439 | 5.37394  |

|        |          |           |                                                                                                                                                                                                                             |     |          |          |
|--------|----------|-----------|-----------------------------------------------------------------------------------------------------------------------------------------------------------------------------------------------------------------------------|-----|----------|----------|
| ALL_42 | POSITIVE | RELAPSE   | 47XY,der(8;9)(q10,q10),t(9;22)(q34,q11),t(8;9)(q10,q10)x2[24]/46XY[1];25/03/2014:47,XY,der(8)dic(8;9)(p11;p11)t(9;22)(q34;q11),+der(8)dic(8;9)(p11;p11)t(9;22)(q34;q11),-9,t(9;22)(q34;q11),+der(22)t(9;22)(q34;q11)[17/20] | BM  | 10.04857 | 5.356109 |
| ALL_43 | NEGATIVE | DIAGNOSIS | 46XY [15]                                                                                                                                                                                                                   | BM  | 7.992489 | 5.336129 |
| ALL_44 | POSITIVE | RELAPSE   | 46XY                                                                                                                                                                                                                        | BM  | 10.89946 | 5.738832 |
| ALL_45 | NEGATIVE | DIAGNOSIS | NA                                                                                                                                                                                                                          | PBL | 10.84403 | 6.22847  |
| ALL_46 | NEGATIVE | DIAGNOSIS | 46 XY [18]                                                                                                                                                                                                                  | BM  | 7.179438 | 4.968322 |
| ALL_47 | POSITIVE | DIAGNOSIS | NA                                                                                                                                                                                                                          | BM  | 9.956452 | 5.30653  |
| ALL_48 | NEGATIVE | DIAGNOSIS | 47XYY                                                                                                                                                                                                                       | PBL | 9.380877 | 5.286138 |
| ALL_49 | NEGATIVE | DIAGNOSIS | 46XX                                                                                                                                                                                                                        | BM  | 9.466752 | 5.346818 |
| ALL_50 | NEGATIVE | RELAPSE   | 46,XY,t(2;16)(p15;q22)[5]/46,XY[25]                                                                                                                                                                                         | BM  | 9.362621 | 5.233042 |
| ALL_51 | NEGATIVE | DIAGNOSIS | 46XY [15]; t(2;16)(p15;q22) [5]                                                                                                                                                                                             | BM  | 10.67229 | 6.100287 |
| ALL_52 | POSITIVE | DIAGNOSIS | 46XX[2]/46XX,t(9;22)[3]                                                                                                                                                                                                     | BM  | 7.999699 | 4.714951 |
| ALL_53 | POSITIVE | RELAPSE   | 46XYdup(2)(p21;q37)t(9;22)(q34;q11)[20]                                                                                                                                                                                     | BM  | 10.412   | 5.658134 |
| ALL_54 | POSITIVE | DIAGNOSIS | 45XY,-7,t(9;22)(q34;q11)[20/20]                                                                                                                                                                                             | BM  | 8.997415 | 4.76714  |
| ALL_55 | NEGATIVE | RELAPSE   | 46XY [14]                                                                                                                                                                                                                   | BM  | 10.80116 | 5.7076   |
| ALL_56 | NEGATIVE | DIAGNOSIS | NA                                                                                                                                                                                                                          | BM  | 9.01478  | 5.295629 |
| ALL_57 | NEGATIVE | DIAGNOSIS | 46 XY                                                                                                                                                                                                                       | BM  | 9.512726 | 5.108504 |
| ALL_58 | NEGATIVE | DIAGNOSIS | 48,XY,t(2;2)(p21;p25),+5,i(6p),+8,i(9q)[11/25]                                                                                                                                                                              | BM  | 9.822683 | 5.436239 |

BM= bone marrow blood; PBL= Peripheral blood

**Table S2.** Patient's characteristic ex vivo AZD-1775 treatment in single agent or in combination

| Sample ID | BCR-ABL1 translocation | Stage of the disease | Sample type | Karyotype                                                                                                                                                                                    |
|-----------|------------------------|----------------------|-------------|----------------------------------------------------------------------------------------------------------------------------------------------------------------------------------------------|
| ALL #1    | Negative               | Relapse              | BM          | 46,XY,t(12;16)(p15;q22) (3/30)                                                                                                                                                               |
| ALL #2    | Negative               | Relapse              | BM          | NA                                                                                                                                                                                           |
| ALL #3    | Negative               | Diagnosis            | BM          | 47,XY,+10,add(16)(p13)[8]/47,XY,id.,del(7)(q11)[1]/N[1]                                                                                                                                      |
| ALL #4    | Negative               | Relapse              | BM          | NA                                                                                                                                                                                           |
| ALL #5    | Negative               | Diagnosis            | PBL         | NA                                                                                                                                                                                           |
| ALL #6    | Negative               | Relapse              | PBL         | 47,XX,t(1;2)(p22;q11),t(1;5)(p12;q13),i(7)(q10),der(4),der(11)t(4;11)(q21;q23),t(13;17)(q12;p11),+M(5/5)                                                                                     |
| ALL #7    | Negative               | Diagnosis            | PBL         | 46,XY,dup(1)(q21q32),t(8;14)(q24;q32),del(7)(q32q36),add(11)(q23)(11)/46,XY,t(8;14),del(7q).add(11q)(5)/46,XY,t(8;14),del(7q)(2)/46,XY,dup(1q)(8;14),del(7q),add(11q),add(12)(q24)(1)        |
| ALL #8    | Negative               | Relapse              | BM          | NA                                                                                                                                                                                           |
| ALL #9    | Positive               | Relapse              | BM          | NA                                                                                                                                                                                           |
| ALL #10   | Positive               | Diagnosis            | BM          | 46,XX,t(8;12)(q22;p13),t(9;22)(q34;q11)(1)/47,XX,t(8;12),t(9;22),-random,+2Ms(3)/48,XX,+8,t(8;12),t(9;22),+M(1)/46,XX,t(8;12),t(9;22),i(17)(q10)(1)/46,XX,t(8;12),i(8)(q10),t(9;22)(1)/N(13) |
| ALL #11   | Positive               | Diagnosis            | PBL         | del(9q) 34% / +Ph 57,5%                                                                                                                                                                      |
| ALL #12   | Positive               | Diagnosis            | BM          | NA                                                                                                                                                                                           |
| ALL #13   | Positive               | Diagnosis            | BM          | 49,XY,+der(3)del(3)(p11),+4,+der(5)del(4)(p11),t(9;22)(q34;q11)                                                                                                                              |
| ALL #14   | Negative               | Diagnosis            | BM          | NA                                                                                                                                                                                           |
| ALL #15   | Negative               | Relapse              | BM          | NA                                                                                                                                                                                           |

BM= bone marrow blood; PBL= Peripheral blood

**Table S3.** Quantitative analyses of G2/M checkpoint related genes. Differential gene expression of 24 genes involved in the regulation of the G2/M checkpoint of primary leukemic cells in comparison to normal mononuclear cells (MNCs). In the table the primary leukemic samples have been divided into three groups based on the ex vivo sensitivity to AZD-1775. Very Good IC50<5uM; Good IC50< 10uM; poor IC50>10 uM.

| PRIMARY LEUKEMIC CELLS Vs MNCs | Sample    | Mean Cq | Mean Efficiency Corrected Cq | Normalized Expression | Relative Normalized Expression | Regulation | P-Value  |
|--------------------------------|-----------|---------|------------------------------|-----------------------|--------------------------------|------------|----------|
| PKMYT1                         | VERY GOOD | 29.43   | 29.43                        | 0.00844               | 64.35907                       | 64.35907   | 0.004867 |
| GADD45A                        | VERY GOOD | 22.43   | 22.59                        | 0.96603               | 2.80771                        | 2.80771    | 0.011876 |
| CHEK1                          | VERY GOOD | 25.09   | 24.17                        | 0.32371               | 11.11864                       | 11.11864   | 0.023908 |
| GADD45B                        | POOR      | 25.81   | 25.81                        | 0.32260               | 0.15870                        | -6.30132   | 0.027860 |
| BRCA1                          | VERY GOOD | 24.46   | 23.74                        | 0.43507               | 1.64114                        | 1.64114    | 0.053765 |
| GADD45B                        | VERY GOOD | 25.02   | 25.02                        | 0.17943               | 0.08827                        | -11.32884  | 0.059560 |
| ATR                            | VERY GOOD | 25.08   | 23.98                        | 0.36950               | 0.26836                        | -3.72638   | 0.068452 |
| CDC25C                         | VERY GOOD | 28.07   | 27.86                        | 0.02502               | 10.27334                       | 10.27334   | 0.083565 |
| MAPK14                         | VERY GOOD | 23.48   | 23.48                        | 0.52360               | 0.40793                        | -2.45138   | 0.088226 |
| UBC                            | GOOD      | 21.75   | 22.98                        | 3.14030               | 0.26203                        | -3.81642   | 0.119868 |

|         |           |       |       |         |          |           |          |
|---------|-----------|-------|-------|---------|----------|-----------|----------|
| CCNA1   | GOOD      | 31.29 | 31.96 | 0.00621 | 3.26626  | 3.26626   | 0.135636 |
| MAPK14  | GOOD      | 25.92 | 25.92 | 0.41082 | 0.32007  | -3.12430  | 0.137909 |
| CHEK2   | VERY GOOD | 26.69 | 25.12 | 0.16764 | 0.55001  | -1.81815  | 0.148619 |
| CCNB2   | VERY GOOD | 24.08 | 23.55 | 0.49537 | 12.80125 | 12.80125  | 0.151765 |
| CCNA2   | VERY GOOD | 24.75 | 24.39 | 0.27842 | 9.53094  | 9.53094   | 0.170384 |
| CDK1    | VERY GOOD | 24.28 | 23.21 | 0.62784 | 16.36977 | 16.36977  | 0.176841 |
| ATR     | GOOD      | 26.46 | 25.30 | 0.63040 | 0.45784  | -2.18415  | 0.178589 |
| CCNB1   | VERY GOOD | 24.85 | 24.85 | 0.20258 | 9.46808  | 9.46808   | 0.194237 |
| GADD45A | GOOD      | 23.27 | 23.43 | 2.29611 | 6.67353  | 6.67353   | 0.209029 |
| WEE1    | VERY GOOD | 24.79 | 24.24 | 0.30714 | 3.19940  | 3.19940   | 0.213592 |
| UBC     | VERY GOOD | 18.92 | 19.99 | 5.86028 | 0.48898  | -2.04507  | 0.228821 |
| GADD45B | GOOD      | 25.26 | 25.26 | 0.64689 | 0.31823  | -3.14240  | 0.229593 |
| CDK1    | GOOD      | 27.24 | 26.04 | 0.37720 | 9.83468  | 9.83468   | 0.265804 |
| CCNB2   | GOOD      | 27.22 | 26.62 | 0.25174 | 6.50538  | 6.50538   | 0.268660 |
| CHEK1   | GOOD      | 28.63 | 27.58 | 0.12917 | 4.43660  | 4.43660   | 0.269676 |
| CCNB1   | GOOD      | 27.70 | 27.70 | 0.11963 | 5.59111  | 5.59111   | 0.279290 |
| CDK1    | POOR      | 27.73 | 26.51 | 0.19749 | 5.14910  | 5.14910   | 0.280883 |
| CCNA2   | GOOD      | 27.88 | 27.48 | 0.13926 | 4.76718  | 4.76718   | 0.283551 |
| CDC25C  | GOOD      | 31.63 | 31.40 | 0.00920 | 3.77543  | 3.77543   | 0.295813 |
| WEE1    | GOOD      | 27.03 | 26.44 | 0.28635 | 2.98288  | 2.98288   | 0.300946 |
| ATM     | GOOD      | 26.60 | 24.83 | 0.87250 | 0.09139  | -10.94255 | 0.323136 |
| TP53    | POOR      | 24.94 | 24.22 | 0.97140 | 1.93351  | 1.93351   | 0.323960 |
| ATM     | VERY GOOD | 23.59 | 22.02 | 1.43716 | 0.15053  | -6.64324  | 0.346950 |
| CCNB1   | POOR      | 28.07 | 28.07 | 0.06735 | 3.14780  | 3.14780   | 0.354245 |
| CHEK1   | POOR      | 28.79 | 27.74 | 0.08456 | 2.90427  | 2.90427   | 0.370479 |
| CCNB2   | POOR      | 28.14 | 27.52 | 0.09816 | 2.53668  | 2.53668   | 0.373012 |
| CCNA2   | POOR      | 28.40 | 27.99 | 0.07095 | 2.42884  | 2.42884   | 0.373430 |
| CDC25B  | GOOD      | 27.06 | 27.64 | 0.12461 | 0.12801  | -7.81166  | 0.386695 |
| CDC25B  | VERY GOOD | 24.53 | 25.05 | 0.17552 | 0.18032  | -5.54562  | 0.395532 |
| CHEK2   | POOR      | 28.12 | 26.46 | 0.20455 | 0.67114  | -1.49000  | 0.417725 |
| WEE1    | POOR      | 27.30 | 26.71 | 0.17272 | 1.79916  | 1.79916   | 0.424973 |
| ATM     | POOR      | 23.76 | 22.18 | 3.97147 | 0.41597  | -2.40399  | 0.426138 |
| ATR     | POOR      | 25.47 | 24.35 | 0.88497 | 0.64274  | -1.55584  | 0.433466 |
| GADD45A | POOR      | 25.24 | 25.42 | 0.42226 | 1.22729  | 1.22729   | 0.443490 |
| PLK3    | GOOD      | 31.66 | 32.34 | 0.00478 | 0.05154  | -19.40330 | 0.468920 |
| UBB     | GOOD      | 22.89 | 22.22 | 5.31015 | 0.51387  | -1.94603  | 0.471815 |
| PLK3    | VERY GOOD | 27.83 | 28.42 | 0.01697 | 0.18289  | -5.46764  | 0.483102 |
| PKMYT1  | GOOD      | 36.59 | 36.59 | 0.00025 | 1.92270  | 1.92270   | 0.491260 |
| FANCD2  | POOR      | 26.98 | 26.39 | 0.21457 | 0.66706  | -1.49911  | 0.552795 |
| CDC25B  | POOR      | 25.33 | 25.88 | 0.30714 | 0.31554  | -3.16917  | 0.556587 |
| CDKN1A  | GOOD      | 28.07 | 27.25 | 0.16264 | 0.73573  | -1.35919  | 0.581715 |
| TP53    | VERY GOOD | 23.12 | 22.45 | 1.06836 | 2.12649  | 2.12649   | 0.586743 |
| FANCD2  | VERY GOOD | 25.07 | 24.52 | 0.25317 | 0.78707  | -1.27053  | 0.607733 |
| UBB     | POOR      | 21.60 | 20.97 | 9.21530 | 0.89177  | -1.12137  | 0.609863 |
| BRCA1   | GOOD      | 27.60 | 26.79 | 0.22389 | 0.84456  | -1.18404  | 0.640770 |
| BLM     | GOOD      | 28.14 | 27.32 | 0.15515 | 1.13687  | 1.13687   | 0.675464 |
| CDC25C  | POOR      | 32.91 | 32.68 | 0.00276 | 1.13328  | 1.13328   | 0.681660 |
| FANCD2  | GOOD      | 27.55 | 26.94 | 0.20127 | 0.62572  | -1.59815  | 0.693531 |
| CCNA1   | VERY GOOD | 30.98 | 31.65 | 0.00182 | 0.95544  | -1.04664  | 0.706258 |
| CHEK2   | GOOD      | 28.22 | 26.56 | 0.26308 | 0.86316  | -1.15854  | 0.715387 |
| CDKN1A  | POOR      | 26.71 | 25.93 | 0.29519 | 1.33538  | 1.33538   | 0.733341 |
| PLK3    | POOR      | 27.66 | 28.25 | 0.05928 | 0.63904  | -1.56485  | 0.745289 |
| CDKN1A  | VERY GOOD | 25.45 | 24.70 | 0.22347 | 1.01093  | 1.01093   | 0.748896 |
| PKMYT1  | POOR      | 36.23 | 36.23 | 0.00024 | 1.79545  | 1.79545   | 0.772607 |
| UBC     | POOR      | 20.40 | 21.55 | 6.14821 | 0.51300  | -1.94930  | 0.837465 |

|        |           |       |       |          |         |          |          |
|--------|-----------|-------|-------|----------|---------|----------|----------|
| UBB    | VERY GOOD | 19.78 | 19.20 | 10.14642 | 0.98187 | -1.01846 | 0.840311 |
| TP53   | GOOD      | 26.42 | 25.65 | 0.49368  | 0.98263 | -1.01768 | 0.849969 |
| CCNA1  | POOR      | 32.43 | 33.12 | 0.00202  | 1.06395 | 1.06395  | 0.873590 |
| BLM    | POOR      | 27.71 | 26.90 | 0.15095  | 1.10605 | 1.10605  | 0.894410 |
| MAPK14 | POOR      | 24.75 | 24.75 | 0.67259  | 0.52401 | -1.90834 | 0.906429 |
| BLM    | VERY GOOD | 25.73 | 24.98 | 0.18447  | 1.35169 | 1.35169  | 0.911966 |
| BRCA1  | POOR      | 27.39 | 26.59 | 0.18722  | 0.70622 | -1.41600 | 0.956251 |
