# Supplementary material for: Targeting WEE1 to enhance conventional therapies for acute lymphoblastic leukemia
Source: PubMed Central journal article supplement (PMC6090987; doi:10.1186/s13045-018-0641-1), 2018-08-01

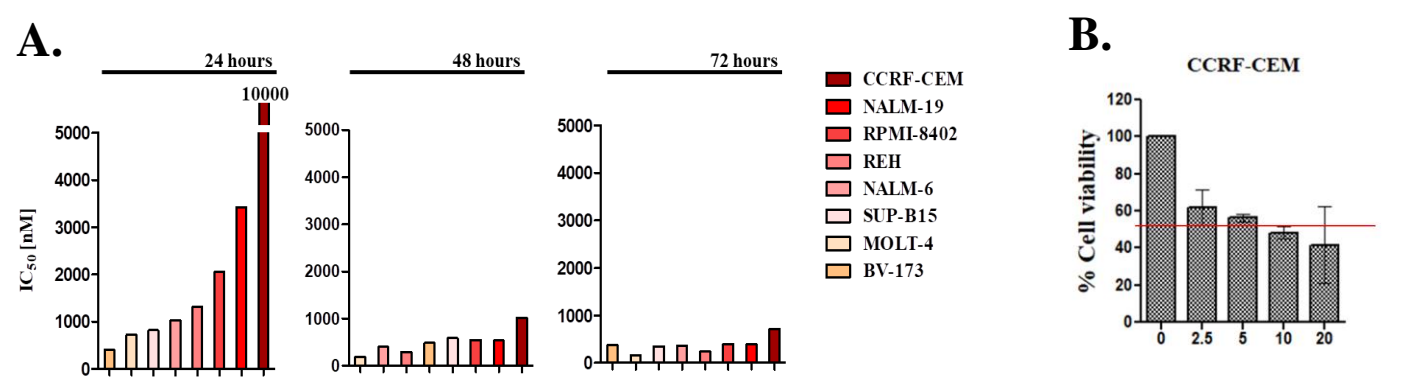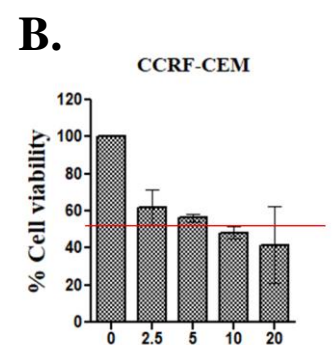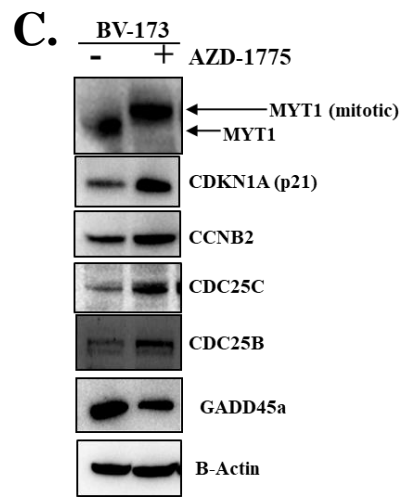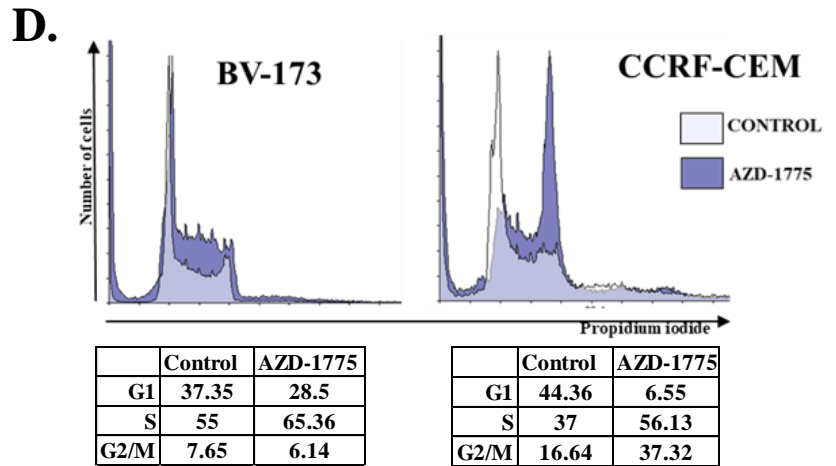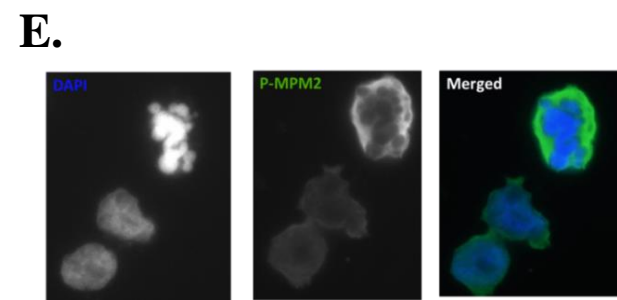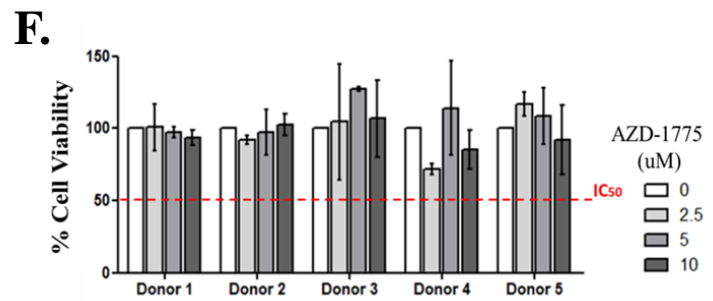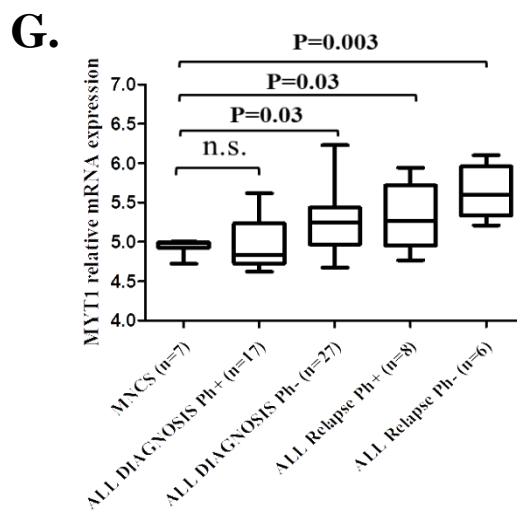

**A.**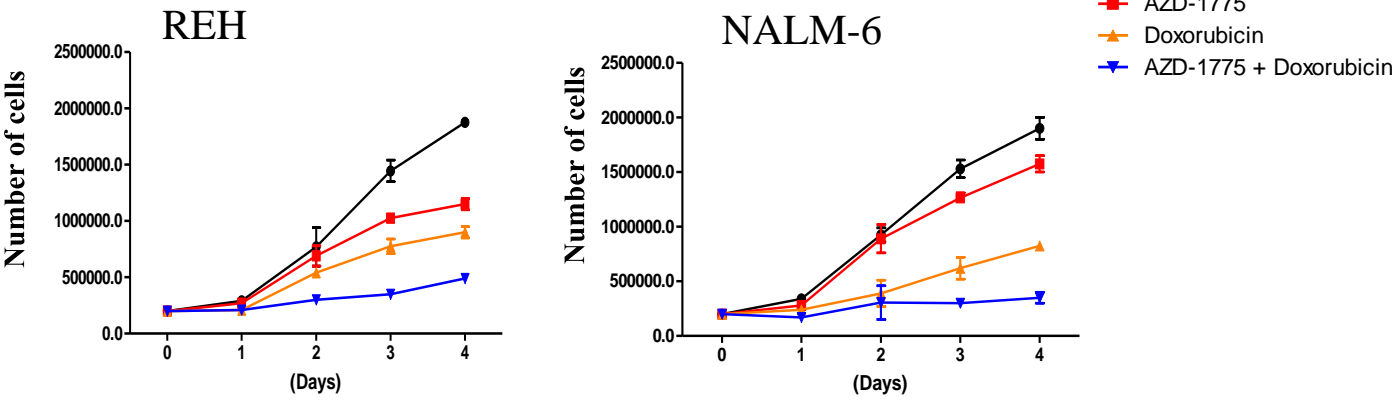**B.**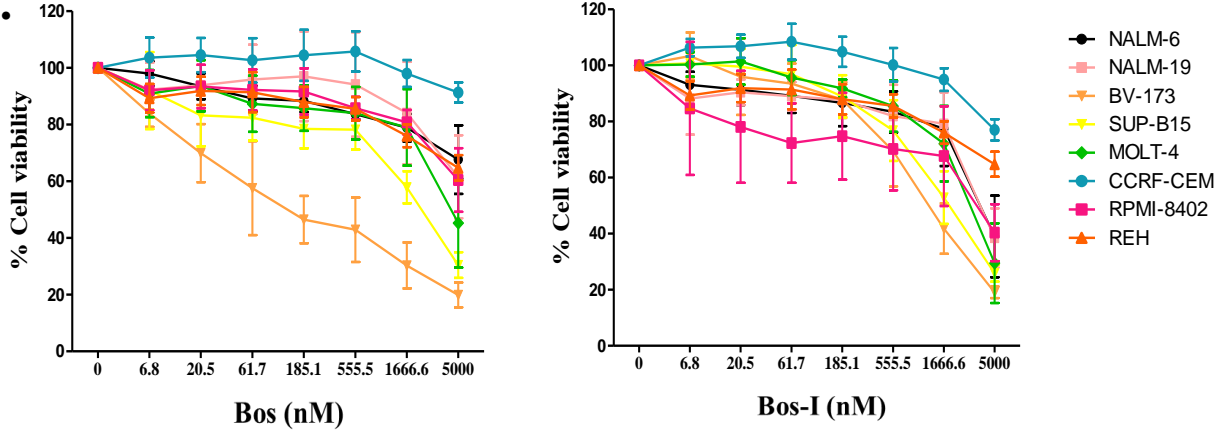**C.**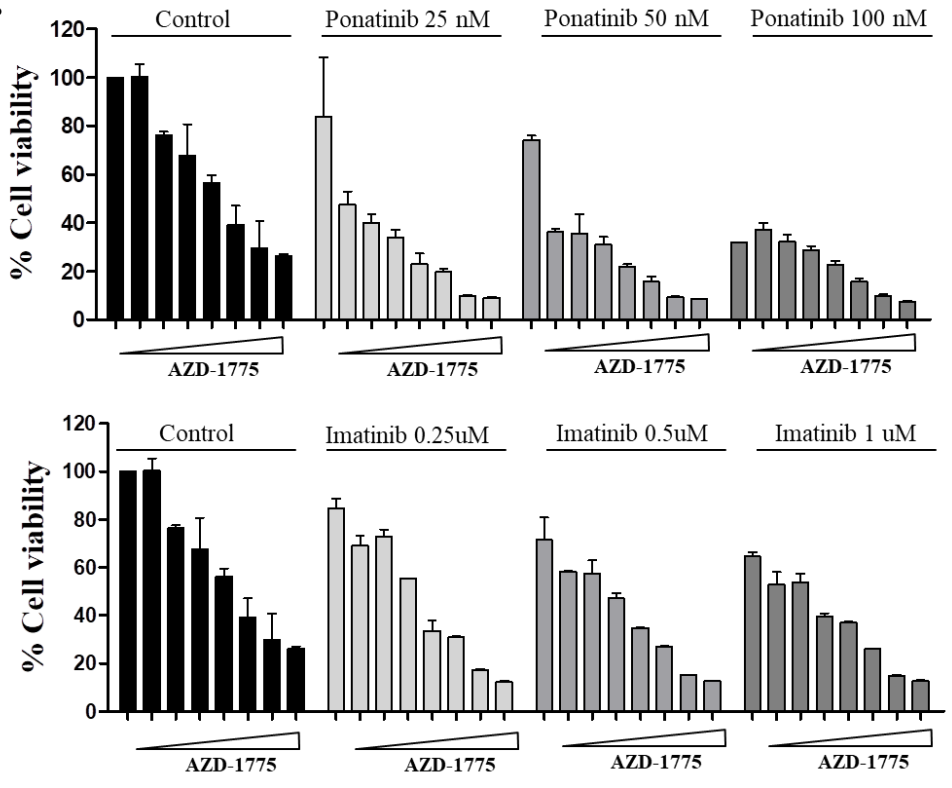

**A.**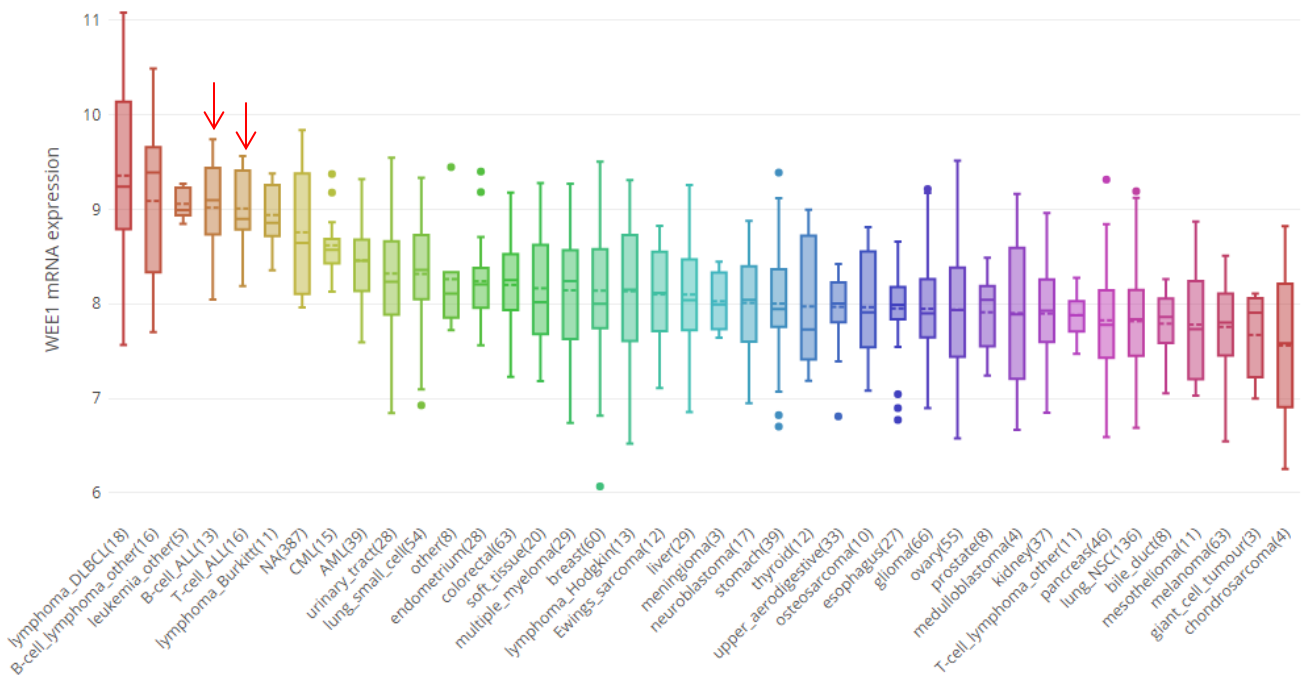

Supplement: 13045_2018_641_MOESM2_ESM.pdf [file 13045_2018_641_MOESM2_ESM.pdf]
